# Supplementary material for: Transcriptional signaling pathways inversely regulated in Alzheimer's disease and glioblastoma multiform
Source: PubMed Central journal article supplement — Sci Rep. 2013 Dec 10;3:3467. doi: 10.1038/srep03467 (PMC4894382; doi:10.1038/srep03467), 2013-12-10
Supplement: srep03467-s1.pdf [file srep03467-s1.pdf]

**Transcriptional signaling pathways inversely regulated in Alzheimer's disease and glioblastoma multiform**

Timothy Liu, Ding Ren, Xiaoping Zhu, Zheng Yin, Guangxu Jin, Zhen Zhao, Daniel Robinson, Xuping Li, Kelvin Wong, Kemi Cui, Hong Zhao, Stephen TC Wong

A

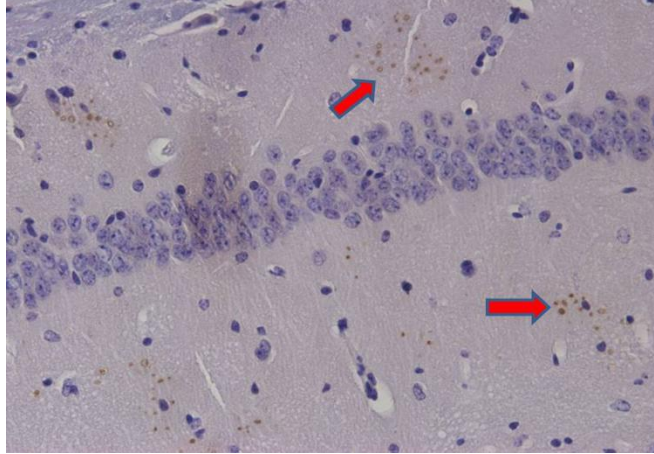

**Supp Fig 1. A $\beta$  plaque formation in AD mouse model**

Stains indicate A $\beta$  plaques that have formed in the brains of 12-month old APPswe transgenic mice

Transcriptional signaling pathways inversely regulated in Alzheimer's disease and glioblastoma multiforme

Timothy Liu, Ding Ren, Xiaoping Zhu, Zheng Yin, Guangxu Jin, Zhen Zhao, Daniel Robinson, Xuping Li, Kelvin Wong, Kemi Cui, Hong Zhao, Stephen TC

Supplementary Table 1. Differentially expressed genes enriched in GBM- and AD+ group

| GBM      | p-value (GBM) | AD      | p-value (AD) | [AD]-[GBM] | Gene Symbol | Description                                                                      |
|----------|---------------|---------|--------------|------------|-------------|----------------------------------------------------------------------------------|
| -19.0053 | 0             | 2.90436 | 8.00E-14     | 21.90966   | CXCR4       | chemokine (C-X-C motif) receptor 4                                               |
| -17.0223 | 0             | 1.59531 | 4.19E-11     | 18.61761   | CDKN2C      | cyclin-dependent kinase inhibitor 2C (p18, inhibits CDK4)                        |
| -15.7619 | 3.80E-15      | 1.55059 | 6.89E-09     | 17.31249   | NES         | nestin                                                                           |
| -14.5191 | 1.89E-25      | 2.33212 | 4.72E-15     | 16.85122   | ID3         | inhibitor of DNA binding 3, dominant negative helix-loop-helix protein           |
| -13.2316 | 5.97E-22      | 1.84979 | 5.63E-19     | 15.08139   | C21orf62    | chromosome 21 open reading frame 62                                              |
| -7.41736 | 1.21E-24      | 1.5886  | 6.41E-11     | 9.00596    | TCF7L1      | transcription factor 7-like 1 (T-cell specific, HMG-box)                         |
| -6.76226 | 2.69E-14      | 1.90321 | 8.41E-07     | 8.66547    | SPP1        | secreted phosphoprotein 1                                                        |
| -5.86117 | 1.95E-10      | 1.75826 | 2.76E-14     | 7.61943    | ANGPT2      | angiopoietin 2                                                                   |
| -5.6675  | 6.41E-08      | 1.88748 | 4.39E-12     | 7.55498    | AEBP1       | AE binding protein 1                                                             |
| -5.64867 | 3.35E-42      | 1.84838 | 6.30E-19     | 7.49705    | PTBP1       | polypyrimidine tract binding protein 1                                           |
| -5.81855 | 7.90E-34      | 1.51352 | 6.06E-09     | 7.33207    | DENND2A     | DENN/MADD domain containing 2A                                                   |
| -5.43669 | 3.19E-12      | 1.69113 | 2.33E-09     | 7.12782    | GBP2        | guanylate binding protein 2, interferon-inducible                                |
| -5.41383 | 1.23E-41      | 1.56233 | 7.91E-09     | 6.97616    | EFNA1       | ephrin-A1                                                                        |
| -4.62267 | 1.04E-27      | 2.09584 | 1.18E-20     | 6.71851    | DDR1        | discoidin domain receptor tyrosine kinase 1                                      |
| -4.64805 | 4.61E-19      | 2.01807 | 8.07E-16     | 6.66612    | CALD1       | caldesmon 1                                                                      |
| -4.99189 | 2.24E-22      | 1.57084 | 1.94E-10     | 6.56273    | DTYMK       | deoxythymidylate kinase (thymidylate kinase)                                     |
| -4.74692 | 5.60E-18      | 1.8122  | 3.14E-11     | 6.55912    | TNFRSF1A    | tumor necrosis factor receptor superfamily, member 1A                            |
| -3.88905 | 4.31E-08      | 2.47215 | 1.94E-11     | 6.3612     | ZBTB20      | zinc finger and BTB domain containing 20                                         |
| -4.68899 | 4.16E-26      | 1.56706 | 2.45E-10     | 6.25605    | SYK         | spleen tyrosine kinase                                                           |
| -4.14684 | 1.20E-25      | 1.96033 | 1.39E-13     | 6.10717    | VEZF1       | vascular endothelial zinc finger 1                                               |
| -4.48733 | 1.05E-19      | 1.5205  | 4.97E-11     | 6.00783    | BAZ1A       | bromodomain adjacent to zinc finger domain, 1A                                   |
| -4.38735 | 6.87E-26      | 1.42505 | 7.89E-07     | 5.8124     | HEATR2      | HEAT repeat containing 2                                                         |
| -3.88255 | 3.47E-14      | 1.85299 | 4.38E-19     | 5.73554    | TIMELESS    | <i>timeless</i> homolog (Drosophila)                                             |
| -3.18841 | 3.78E-13      | 2.53509 | 2.66E-15     | 5.7235     | ERBB2IP     | erbB2 interacting protein                                                        |
| -3.52176 | 3.22E-11      | 2.07833 | 1.51E-12     | 5.60009    | LAMB2       | laminin, beta 2 (laminin S)                                                      |
| -3.06204 | 4.58E-07      | 2.50823 | 1.10E-14     | 5.57027    | MSX1        | msh homeobox 1                                                                   |
| -2.99046 | 4.22E-23      | 2.45698 | 2.59E-19     | 5.44744    | TNPO1       | transportin 1                                                                    |
| -3.94351 | 6.80E-27      | 1.4899  | 2.34E-08     | 5.43341    | NECAP2      | NECAP endocytosis associated 2                                                   |
| -3.16239 | 4.86E-15      | 2.26682 | 2.37E-16     | 5.42921    | SERPINB6    | serpin peptidase inhibitor, clade B (ovalbumin), member 6                        |
| -3.64234 | 2.29E-16      | 1.76981 | 2.43E-07     | 5.41215    | LAMP2       | lysosomal-associated membrane protein 2                                          |
| -3.60566 | 1.42E-10      | 1.65278 | 8.57E-10     | 5.25844    | SMAD1       | SMAD family member 1                                                             |
| -3.07934 | 6.32E-18      | 2.17592 | 1.75E-12     | 5.25526    | BGN         | biglycan                                                                         |
| -3.17502 | 1.16E-12      | 2.02173 | 1.47E-13     | 5.19675    | CEBPD       | CCAAT/enhancer binding protein (C/EBP), delta                                    |
| -3.71517 | 3.92E-15      | 1.40543 | 4.82E-08     | 5.1206     | CHD1        | chromodomain helicase DNA binding protein 1                                      |
| -3.21798 | 3.83E-22      | 1.89548 | 3.45E-11     | 5.11346    | PKN2        | protein kinase N2                                                                |
| -3.59339 | 5.85E-25      | 1.50148 | 1.21E-08     | 5.09487    | G3BP1       | GTPase activating protein (SH3 domain) binding protein 1                         |
| -2.51583 | 4.31E-09      | 2.35692 | 2.13E-21     | 4.87275    | C6orf145    | PX domain containing 1 (Previous name: chromosome 6 open reading frame 145)      |
| -1.98044 | 1.25E-07      | 2.87561 | 2.00E-18     | 4.85605    | GOLIM4      | golgi integral membrane protein 4                                                |
| -2.64538 | 8.00E-10      | 2.19857 | 1.22E-13     | 4.84395    | HLA-E       | major histocompatibility complex, class I, E                                     |
| -3.11744 | 1.29E-15      | 1.60757 | 2.57E-10     | 4.72501    | SDCCAG3     | serologically defined colon cancer antigen 3                                     |
| -2.88873 | 1.06E-12      | 1.72948 | 4.82E-15     | 4.61821    | STAT3       | signal transducer and activator of transcription 3 (acute-phase response factor) |
| -2.15023 | 1.42E-08      | 2.40808 | 2.71E-25     | 4.55831    | FAM63A      | family with sequence similarity 63, member A                                     |
| -3.01971 | 1.10E-21      | 1.48649 | 2.84E-08     | 4.5062     | SLC39A1     | solute carrier family 39 (zinc transporter), member 1                            |
| -2.76503 | 5.73E-14      | 1.67962 | 6.04E-15     | 4.44465    | ELF1        | E74-like factor 1 (ets domain transcription factor)                              |

|          |          |         |          |         |          |                                                                                                   |
|----------|----------|---------|----------|---------|----------|---------------------------------------------------------------------------------------------------|
| -2.31955 | 4.37E-10 | 2.01794 | 9.27E-13 | 4.33749 | VGLL4    | vestigial like 4 (Drosophila)                                                                     |
| -2.27348 | 2.19E-08 | 1.95519 | 3.35E-23 | 4.22867 | SMARCC1  | SWI/SNF related, matrix associated, actin dependent regulator of chromatin, subfamily c, member 1 |
| -1.93025 | 8.83E-07 | 2.29448 | 6.11E-10 | 4.22473 | NIPBL    | Nipped-B homolog (Drosophila)                                                                     |
| -2.55914 | 1.69E-14 | 1.64399 | 1.77E-12 | 4.20313 | CTDSP1   | CTD (carboxy-terminal domain, RNA polymerase II, polypeptide A) small phosphatase 1               |
| -2.42312 | 4.42E-30 | 1.72389 | 7.18E-15 | 4.14701 | RBM38    | RNA binding motif protein 38                                                                      |
| -2.29197 | 2.19E-10 | 1.81327 | 1.45E-16 | 4.10524 | RAF1     | v-raf-1 murine leukemia viral oncogene homolog 1                                                  |
| -2.69259 | 3.30E-13 | 1.40503 | 2.20E-06 | 4.09762 | ABHD4    | abhydrolase domain containing 4                                                                   |
| -2.43697 | 1.75E-21 | 1.62345 | 6.86E-12 | 4.06042 | TGIF2    | TGFB-induced factor homeobox 2                                                                    |
| -2.41145 | 2.10E-06 | 1.64861 | 1.20E-08 | 4.06006 | KLF6     | Kruppel-like factor 6                                                                             |
| -2.19036 | 3.96E-14 | 1.77242 | 1.31E-10 | 3.96278 | TROVE2   | TROVE domain family, member 2                                                                     |
| -2.26591 | 2.16E-13 | 1.68546 | 1.07E-13 | 3.95137 | C1orf144 | SUZ RNA binding domain containing 1 (Previous name: chromosome 1 open reading frame 144)          |
| -2.51365 | 1.40E-19 | 1.42601 | 7.51E-07 | 3.93966 | MYO1F    | myosin IF                                                                                         |
| -2.31378 | 3.95E-19 | 1.50931 | 7.73E-09 | 3.82309 | DDAH2    | dimethylarginine dimethylaminohydrolase 2                                                         |
| -2.27207 | 5.50E-12 | 1.51163 | 3.22E-08 | 3.7837  | MCL1     | myeloid cell leukemia sequence 1 (BCL2-related)                                                   |
| -1.96875 | 1.70E-09 | 1.73408 | 3.46E-15 | 3.70283 | LSM14A   | <i>LSM14A</i> , SCD6 homolog A ( <i>S. cerevisiae</i> )                                           |
| -1.76377 | 1.24E-06 | 1.93745 | 4.49E-22 | 3.70122 | TCF3     | transcription factor 3 (E2A immunoglobulin enhancer binding factors E12/E47)                      |
| -2.00923 | 3.14E-18 | 1.57677 | 1.34E-10 | 3.586   | CDK2AP1  | cyclin-dependent kinase 2 associated protein 1                                                    |
| -1.8925  | 6.83E-15 | 1.60154 | 3.27E-13 | 3.49404 | EEF1D    | eukaryotic translation elongation factor 1 delta (guanine nucleotide exchange protein)            |
| -1.77413 | 5.60E-18 | 1.66466 | 4.43E-13 | 3.43879 | C7orf26  | chromosome 7 open reading frame 26                                                                |
| -1.72232 | 1.82E-13 | 1.67786 | 1.80E-13 | 3.40018 | IKBKB    | inhibitor of kappa light polypeptide gene enhancer in B-cells, kinase beta                        |
| -1.82373 | 2.27E-08 | 1.53305 | 1.92E-09 | 3.35678 | INPPL1   | inositol polyphosphate phosphatase-like 1                                                         |
| -1.89756 | 1.11E-07 | 1.3988  | 3.00E-06 | 3.29636 | FTSJ3    | FtsJ homolog 3 ( <i>E. coli</i> )                                                                 |
| -1.73929 | 1.62E-06 | 1.55294 | 1.44E-12 | 3.29223 | DOCK6    | dedicator of cytokinesis 6                                                                        |
| -1.69777 | 6.01E-06 | 1.50283 | 1.12E-08 | 3.2006  | MAML1    | mastermind-like 1 (Drosophila)                                                                    |
| -1.51592 | 3.03E-07 | 1.43796 | 4.01E-07 | 2.95388 | NUP214   | nucleoporin 214kDa                                                                                |

## Transcriptional signaling pathways inversely regulated in Alzheimer's disease and glioblastoma multiform

Timothy Liu, Ding Ren, Xiaoping Zhu, Zheng Yin, Guangxu Jin, Zhen Zhao, Daniel Robinson, Xuping Li, Kelvin Wong, Kemi

supplementary Table 2. Differentially expressed genes enriched in GBM+ and AD- group

| GBM     | p-value (GBM) | AD       | p-value (AD) | [GBM] - [AD] | Gene Symbol | Description                                                                                           |
|---------|---------------|----------|--------------|--------------|-------------|-------------------------------------------------------------------------------------------------------|
| 69.8354 | 9.36E-24      | -5.03278 | 1.47E-12     | 74.86818     | VSNL1       | visinin-like 1                                                                                        |
| 66.1181 | 5.38E-38      | -2.22593 | 1.99E-12     | 68.34403     | SLC17A7     | solute carrier family 17 (sodium-dependent inorganic phosphate cotransporter), member 7               |
| 50.0319 | 2.53E-21      | -2.92639 | 7.63E-09     | 52.95829     | SYT1        | synaptotagmin I                                                                                       |
| 48.0145 | 2.70E-24      | -2.59281 | 4.94E-09     | 50.60731     | SNAP91      | synaptosomal-associated protein, 91kDa homolog (mouse)                                                |
| 41.9258 | 0             | -2.02067 | 4.06E-13     | 43.94647     | CACNG3      | calcium channel, voltage-dependent, gamma subunit 3                                                   |
| 33.9691 | 8.53E-18      | -5.50808 | 4.89E-18     | 39.47718     | SNAP25      | synaptosomal-associated protein, 25kDa                                                                |
| 35.5137 | 3.26E-26      | -2.57222 | 1.30E-16     | 38.08592     | CRYM        | crystallin, mu                                                                                        |
| 34.1107 | 7.52E-27      | -1.66045 | 4.00E-07     | 35.77115     | NRGN        | neurogranin (protein kinase C substrate, RC3)                                                         |
| 32.3611 | 7.24E-35      | -2.12943 | 1.26E-11     | 34.49053     | AK5         | adenylate kinase 5                                                                                    |
| 31.1015 | 1.85E-33      | -2.45965 | 1.49E-14     | 33.56115     | RGS4        | regulator of G-protein signaling 4                                                                    |
| 25.0042 | 0             | -2.42994 | 7.03E-12     | 27.43414     | RIMBP2      | RIMS binding protein 2                                                                                |
| 25.6378 | 1.85E-37      | -1.72924 | 4.90E-15     | 27.36704     | SYNGR3      | synaptogyrin 3                                                                                        |
| 24.3029 | 0             | -2.12466 | 5.77E-10     | 26.42756     | STYK1       | serine/threonine/tyrosine kinase 1                                                                    |
| 22.4524 | 1.06E-18      | -2.2731  | 7.26E-07     | 24.7255      | FGF13       | fibroblast growth factor 13                                                                           |
| 19.8853 | 6.38E-26      | -4.11339 | 6.82E-17     | 23.99869     | NMNAT2      | nicotinamide nucleotide adenyltransferase 2                                                           |
| 21.0659 | 3.89E-19      | -2.61304 | 4.04E-08     | 23.67894     | SERPINI1    | serpin peptidase inhibitor, clade I (neuroserpin), member 1                                           |
| 20.4744 | 0             | -2.98104 | 2.10E-12     | 23.45544     | GABRG2      | gamma-aminobutyric acid (GABA) A receptor, gamma 2                                                    |
| 19.5019 | 1.06E-43      | -3.64995 | 1.69E-16     | 23.15185     | SNCA        | synuclein, alpha (non A4 component of amyloid precursor)                                              |
| 17.6841 | 1.15E-21      | -3.22699 | 1.17E-13     | 20.91109     | DYNC111     | dynein, cytoplasmic 1, intermediate chain 1                                                           |
| 17.7008 | 0             | -2.85475 | 3.98E-10     | 20.55555     | SYN2        | synapsin II                                                                                           |
| 18.063  | 1.09E-42      | -1.74732 | 7.51E-09     | 19.81032     | KIAA0513    | <i>KIAA0513 (uncharacterized protein KIAA051)</i>                                                     |
| 15.4449 | 0             | -1.94146 | 1.05E-08     | 17.38636     | CPNE6       | copine VI (neuronal)                                                                                  |
| 14.1886 | 5.61E-45      | -2.41781 | 4.25E-08     | 16.60641     | CACNA2D3    | calcium channel, voltage-dependent, alpha 2/delta subunit 3                                           |
| 14.6089 | 8.23E-18      | -1.76839 | 8.24E-12     | 16.37729     | HSPB3       | heat shock 27kDa protein 3                                                                            |
| 14.1951 | 7.36E-25      | -1.93069 | 5.61E-08     | 16.12579     | STXBP1      | syntaxin binding protein 1                                                                            |
| 13.8307 | 1.30E-43      | -2.16274 | 2.64E-10     | 15.99344     | MAST3       | microtubule associated serine/threonine kinase 3                                                      |
| 12.22   | 0             | -2.01739 | 7.06E-15     | 14.23739     | CCKBR       | cholecystokinin B receptor                                                                            |
| 11.7107 | 0             | -2.23457 | 6.07E-12     | 13.94527     | CNKSR2      | connector enhancer of kinase suppressor of Ras 2                                                      |
| 12.4551 | 1.56E-32      | -1.43619 | 4.41E-07     | 13.89129     | C6orf105    | (now androgen-dependent TFPI-regulating protein (Previous name: chromosome 6 open reading frame 105 ) |
| 11.6403 | 2.31E-17      | -2.06788 | 1.25E-09     | 13.70818     | NAV3        | neuron navigator 3                                                                                    |
| 11.7629 | 0             | -1.92493 | 1.28E-21     | 13.68783     | SLC30A3     | solute carrier family 30 (zinc transporter), member 3                                                 |

|         |          |          |          |          |            |                                                                                                               |
|---------|----------|----------|----------|----------|------------|---------------------------------------------------------------------------------------------------------------|
| 12.0352 | 8.90E-19 | -1.64856 | 1.31E-12 | 13.68376 | FXYP7      | FXYP domain containing ion transport regulator 7                                                              |
| 10.8876 | 2.41E-20 | -2.72527 | 1.51E-11 | 13.61287 | ST6GALNAC5 | ST6 (alpha-N-acetyl-neuraminyl-2,3-beta-galactosyl-1,3)-N-acetylgalactosaminide alpha-2,6-sialyltransferase 5 |
| 10.1852 | 8.17E-21 | -3.09936 | 1.48E-10 | 13.28456 | ENC1       | ectodermal-neural cortex 1 (with BTB-like domain)                                                             |
| 10.679  | 3.24E-41 | -2.32297 | 6.37E-12 | 13.00197 | SULT4A1    | sulfotransferase family 4A, member 1                                                                          |
| 10.9362 | 0        | -1.72639 | 1.73E-08 | 12.66259 | GPR22      | G protein-coupled receptor 22                                                                                 |
| 9.6086  | 2.52E-24 | -2.76907 | 2.18E-12 | 12.37767 | GUCY1B3    | guanylate cyclase 1, soluble, beta 3                                                                          |
| 8.78485 | 1.35E-35 | -3.26765 | 3.03E-17 | 12.0525  | GOT1       | glutamic-oxaloacetic transaminase 1, soluble (aspartate aminotransferase 1)                                   |
| 8.80544 | 1.30E-21 | -1.88344 | 1.24E-10 | 10.68888 | EHD3       | EH-domain containing 3                                                                                        |
| 7.99811 | 5.75E-19 | -1.9885  | 1.67E-10 | 9.98661  | SLITRK5    | SLIT and NTRK-like family, member 5                                                                           |
| 8.03525 | 2.42E-11 | -1.81592 | 1.76E-07 | 9.85117  | BASP1      | brain abundant, membrane attached signal protein 1                                                            |
| 7.16517 | 1.55E-26 | -2.43205 | 1.50E-09 | 9.59722  | PI4KA      | phosphatidylinositol 4-kinase, catalytic, alpha                                                               |
| 6.33827 | 4.57E-23 | -3.24359 | 1.44E-15 | 9.58186  | YWHAH      | tyrosine 3-monooxygenase/tryptophan 5-monooxygenase activation protein, eta polypeptide                       |
| 7.23834 | 2.42E-24 | -2.32901 | 2.48E-08 | 9.56735  | PDE1A      | phosphodiesterase 1A, calmodulin-dependent                                                                    |
| 5.7499  | 1.57E-19 | -3.22365 | 2.11E-15 | 8.97355  | BSCL2      | Berardinelli-Seip congenital lipodystrophy 2 (seipin)                                                         |
| 6.82976 | 2.88E-26 | -1.97198 | 3.46E-16 | 8.80174  | ATP1A3     | ATPase, Na <sup>+</sup> /K <sup>+</sup> transporting, alpha 3 polypeptide                                     |
| 6.72837 | 3.24E-32 | -1.79005 | 4.49E-19 | 8.51842  | PTPN3      | protein tyrosine phosphatase, non-receptor type 3                                                             |
| 6.37841 | 0        | -1.98974 | 7.36E-07 | 8.36815  | TRHDE      | thyrotropin-releasing hormone degrading enzyme                                                                |
| 5.13805 | 2.40E-16 | -3.10573 | 9.16E-14 | 8.24378  | TUBA4A     | tubulin, alpha 4a                                                                                             |
| 5.72132 | 3.63E-14 | -2.49821 | 2.10E-10 | 8.21953  | GABRA5     | gamma-aminobutyric acid (GABA) A receptor, alpha 5                                                            |
| 4.67008 | 1.33E-08 | -3.54264 | 1.95E-13 | 8.21272  | UCHL1      | ubiquitin carboxyl-terminal esterase L1 (ubiquitin thiolesterase)                                             |
| 4.94632 | 4.84E-14 | -3.2254  | 1.37E-12 | 8.17172  | HPRT1      | hypoxanthine phosphoribosyltransferase 1                                                                      |
| 6.16296 | 0        | -1.92571 | 2.79E-12 | 8.08867  | KCNV1      | potassium channel, subfamily V, member 1                                                                      |
| 5.06232 | 2.40E-28 | -3.01742 | 9.96E-13 | 8.07974  | STAT4      | signal transducer and activator of transcription 4                                                            |
| 6.11517 | 7.69E-36 | -1.7648  | 3.69E-16 | 7.87997  | SYP        | synaptophysin                                                                                                 |
| 5.06218 | 5.34E-07 | -2.61984 | 5.83E-09 | 7.68202  | SCG5       | secretogranin V (7B2 protein)                                                                                 |
| 4.2986  | 6.30E-33 | -3.33084 | 2.20E-13 | 7.62944  | ATP6V1H    | ATPase, H <sup>+</sup> transporting, lysosomal 50/57kDa, V1 subunit H                                         |
| 5.04864 | 2.39E-23 | -2.54492 | 4.16E-11 | 7.59356  | SLC9A6     | solute carrier family 9, subfamily A (NHE6, cation proton antiporter 6), member 6                             |
| 5.61695 | 0        | -1.9623  | 1.31E-08 | 7.57925  | NEUROD6    | neuronal differentiation 6                                                                                    |
| 6.04564 | 9.56E-41 | -1.51713 | 2.93E-10 | 7.56277  | GREM2      | gremlin 2                                                                                                     |
| 5.48298 | 3.85E-19 | -2.06085 | 4.81E-11 | 7.54383  | XK         | X-linked Kx blood group (McLeod syndrome)                                                                     |
| 5.95235 | 6.88E-36 | -1.49221 | 2.06E-08 | 7.44456  | KIAA1324   | <i>KIAA1324 (Estrogen-induced gene 121 protein)</i>                                                           |
| 4.76908 | 1.40E-45 | -2.67227 | 2.59E-15 | 7.44135  | GLS        | glutaminase                                                                                                   |
| 4.76053 | 7.03E-29 | -2.57473 | 3.31E-14 | 7.33526  | CALM3      | calmodulin 3 (phosphorylase kinase, delta)                                                                    |
| 5.63535 | 7.18E-36 | -1.61611 | 1.10E-11 | 7.25146  | ZNF215     | zinc finger protein 215                                                                                       |
| 4.29683 | 3.80E-19 | -2.90255 | 1.93E-13 | 7.19938  | ACOT7      | acyl-CoA thioesterase 7                                                                                       |

|         |          |          |          |         |          |                                                                                                         |
|---------|----------|----------|----------|---------|----------|---------------------------------------------------------------------------------------------------------|
| 5.21979 | 2.11E-24 | -1.85222 | 9.93E-09 | 7.07201 | MOAP1    | modulator of apoptosis 1                                                                                |
| 5.5634  | 4.80E-22 | -1.50696 | 8.86E-09 | 7.07036 | STAR     | steroidogenic acute regulatory protein                                                                  |
| 3.80472 | 1.40E-18 | -3.2345  | 2.37E-14 | 7.03922 | ATP6V1B2 | ATPase, H <sup>+</sup> transporting, lysosomal 56/58kDa, V1 subunit B2                                  |
| 4.90147 | 0        | -2.04443 | 8.33E-12 | 6.9459  | CAMK1G   | calcium/calmodulin-dependent protein kinase IG                                                          |
| 3.14873 | 3.53E-36 | -3.79134 | 5.89E-13 | 6.94007 | MDH1     | malate dehydrogenase 1, NAD (soluble)                                                                   |
| 4.7172  | 8.44E-23 | -2.14686 | 1.92E-08 | 6.86406 | WDR7     | WD repeat domain 7                                                                                      |
| 3.98513 | 1.35E-25 | -2.76284 | 2.77E-14 | 6.74797 | RGS7     | regulator of G-protein signaling 7                                                                      |
| 4.67675 | 2.18E-08 | -1.93327 | 9.49E-10 | 6.61002 | LDOC1    | leucine zipper, down-regulated in cancer 1                                                              |
| 4.34982 | 8.26E-23 | -2.21231 | 3.38E-06 | 6.56213 | PPP3CA   | protein phosphatase 3, catalytic subunit, alpha isozyme                                                 |
| 3.8003  | 4.38E-06 | -2.69632 | 2.54E-14 | 6.49662 | NRN1     | neuritin 1                                                                                              |
| 3.83026 | 2.47E-09 | -2.45417 | 5.44E-09 | 6.28443 | PLK2     | polo-like kinase 2                                                                                      |
| 3.65995 | 6.31E-17 | -2.62392 | 4.94E-13 | 6.28387 | NECAP1   | NECAP endocytosis associated 1                                                                          |
| 4.49276 | 7.84E-42 | -1.7659  | 5.71E-10 | 6.25866 | CRH      | corticotropin releasing hormone                                                                         |
| 4.35707 | 1.70E-31 | -1.81543 | 8.16E-18 | 6.1725  | KIAA0319 | <i>KIAA0319(dyslexia-associated protein KIAA0319)</i>                                                   |
| 3.82589 | 7.98E-28 | -2.29756 | 4.37E-15 | 6.12345 | AP3M2    | adaptor-related protein complex 3, mu 2 subunit                                                         |
| 4.51085 | 1.10E-21 | -1.61129 | 1.49E-13 | 6.12214 | CABYR    | calcium binding tyrosine-(Y)-phosphorylation regulated                                                  |
| 4.45015 | 7.01E-45 | -1.54321 | 1.05E-09 | 5.99336 | CDKN2D   | cyclin-dependent kinase inhibitor 2D (p19, inhibits CDK4)                                               |
| 2.05487 | 5.23E-08 | -3.83289 | 2.22E-16 | 5.88776 | YWHAZ    | tyrosine 3-monooxygenase/tryptophan 5-monooxygenase activation protein, zeta polypeptide                |
| 3.54066 | 2.16E-18 | -2.27991 | 2.41E-11 | 5.82057 | TRIM37   | tripartite motif containing 37                                                                          |
| 3.85136 | 6.31E-44 | -1.9658  | 4.05E-23 | 5.81716 | KALRN    | kalirin, RhoGEF kinase                                                                                  |
| 2.85905 | 3.73E-08 | -2.94669 | 8.95E-13 | 5.80574 | RTN3     | reticulon 3                                                                                             |
| 3.47879 | 1.01E-13 | -2.31086 | 5.64E-13 | 5.78965 | SSX2IP   | synovial sarcoma, X breakpoint 2 interacting protein                                                    |
| 3.05376 | 1.76E-26 | -2.73506 | 3.85E-14 | 5.78882 | PAK1     | p21 protein (Cdc42/Rac)-activated kinase 1                                                              |
| 3.90666 | 5.23E-13 | -1.84946 | 9.56E-09 | 5.75612 | B3GNT1   | UDP-GlcNAc:betaGal beta-1,3-N-acetylglucosaminyltransferase 1                                           |
| 4.04744 | 3.00E-13 | -1.68534 | 2.85E-10 | 5.73278 | CDH9     | cadherin 9, type 2 (T1-cadherin)                                                                        |
| 3.82825 | 7.45E-21 | -1.84474 | 3.18E-08 | 5.67299 | C1orf216 | chromosome 1 open reading frame 216                                                                     |
| 3.59106 | 2.60E-14 | -2.07887 | 1.06E-09 | 5.66993 | SLC1A1   | solute carrier family 1 (neuronal/epithelial high affinity glutamate transporter, system Xag), member 1 |
| 2.90251 | 1.69E-13 | -2.74628 | 3.86E-16 | 5.64879 | GLRB     | glycine receptor, beta                                                                                  |
| 2.94701 | 4.28E-25 | -2.68496 | 6.03E-16 | 5.63197 | ATP6V1E1 | ATPase, H <sup>+</sup> transporting, lysosomal 31kDa, V1 subunit E1                                     |
| 3.09872 | 7.87E-17 | -2.51656 | 1.23E-11 | 5.61528 | MAP2K4   | mitogen-activated protein kinase kinase 4                                                               |
| 3.6681  | 0        | -1.9368  | 4.55E-11 | 5.6049  | PRMT8    | protein arginine methyltransferase 8                                                                    |
| 3.93153 | 1.19E-07 | -1.65898 | 8.00E-07 | 5.59051 | PPL      | periplakin                                                                                              |
| 3.40802 | 2.35E-25 | -2.18015 | 5.77E-14 | 5.58817 | LARGE    | like-glycosyltransferase                                                                                |
| 3.86062 | 5.65E-24 | -1.6762  | 6.44E-09 | 5.53682 | ENTPD6   | ectonucleoside triphosphate diphosphohydrolase 6 (putative)                                             |
| 3.48653 | 2.25E-13 | -2.00889 | 7.19E-13 | 5.49542 | FABP3    | fatty acid binding protein 3, muscle and heart (mammary-derived growth inhibitor)                       |

|         |          |          |          |         |           |                                                                                        |
|---------|----------|----------|----------|---------|-----------|----------------------------------------------------------------------------------------|
| 2.24303 | 7.03E-09 | -3.19185 | 1.37E-12 | 5.43488 | RAP1GDS1  | RAP1, GTP-GDP dissociation stimulator 1                                                |
| 3.69969 | 7.12E-26 | -1.70438 | 4.14E-08 | 5.40407 | ARF3      | ADP-ribosylation factor 3                                                              |
| 3.83905 | 6.20E-17 | -1.56395 | 7.60E-09 | 5.403   | B4GALT6   | UDP-Gal:betaGlcNAc beta 1,4- galactosyltransferase, polypeptide 6                      |
| 1.70996 | 4.18E-07 | -3.68599 | 3.29E-19 | 5.39595 | ATP5C1    | ATP synthase, H+ transporting, mitochondrial F1 complex, gamma polypeptide 1           |
| 3.6658  | 0        | -1.72318 | 2.47E-10 | 5.38898 | KCNAB1    | potassium voltage-gated channel, shaker-related subfamily, beta member 1               |
| 3.56936 | 7.29E-18 | -1.79267 | 6.21E-12 | 5.36203 | GABARAPL1 | GABA(A) receptor-associated protein like 1                                             |
| 3.07958 | 2.41E-34 | -2.26235 | 1.78E-10 | 5.34193 | PPP3CB    | protein phosphatase 3, catalytic subunit, beta isozyme                                 |
| 3.48592 | 4.49E-42 | -1.84575 | 1.48E-09 | 5.33167 | CDH12     | cadherin 12, type 2 (N-cadherin 2)                                                     |
| 2.86446 | 4.57E-06 | -2.44715 | 2.05E-12 | 5.31161 | CARTPT    | CART prepropeptide                                                                     |
| 2.84323 | 1.77E-22 | -2.40833 | 1.01E-09 | 5.25156 | MAP2K1    | mitogen-activated protein kinase kinase 1                                              |
| 2.99392 | 1.35E-13 | -2.20323 | 2.73E-09 | 5.19715 | OXCT1     | 3-oxoacid CoA transferase 1                                                            |
| 3.59613 | 1.30E-13 | -1.57784 | 1.26E-10 | 5.17397 | PPP3R1    | protein phosphatase 3, regulatory subunit B, alpha                                     |
| 3.0434  | 1.62E-14 | -2.06185 | 3.74E-09 | 5.10525 | TERF2IP   | telomeric repeat binding factor 2, interacting protein                                 |
| 3.4688  | 2.39E-14 | -1.5222  | 3.65E-09 | 4.991   | VAMP2     | vesicle-associated membrane protein 2 (synaptobrevin 2)                                |
| 2.60617 | 2.01E-10 | -2.38449 | 1.05E-14 | 4.99066 | CDK5      | cyclin-dependent kinase 5                                                              |
| 3.00758 | 2.38E-06 | -1.97344 | 1.34E-09 | 4.98102 | SOSTDC1   | sclerostin domain containing 1                                                         |
| 3.01014 | 6.61E-07 | -1.96743 | 1.41E-11 | 4.97757 | C16orf45  | chromosome 16 open reading frame 45                                                    |
| 3.31278 | 1.10E-15 | -1.61039 | 6.11E-10 | 4.92317 | SEC61A2   | Sec61 alpha 2 subunit ( <i>S. cerevisiae</i> )                                         |
| 2.15416 | 9.93E-09 | -2.75425 | 1.72E-10 | 4.90841 | PCMT1     | protein-L-isoaspartate (D-aspartate) O-methyltransferase                               |
| 2.52009 | 1.13E-30 | -2.38795 | 1.83E-10 | 4.90804 | RBP4      | retinol binding protein 4, plasma                                                      |
| 3.38625 | 2.79E-27 | -1.49393 | 2.63E-05 | 4.88018 | PTPRM     | protein tyrosine phosphatase, receptor type, M                                         |
| 3.21011 | 7.31E-16 | -1.66511 | 1.97E-05 | 4.87522 | ATP6V1A   | ATPase, H+ transporting, lysosomal 70kDa, V1 subunit A                                 |
| 2.22031 | 1.64E-33 | -2.62559 | 1.10E-16 | 4.8459  | GHITM     | growth hormone inducible transmembrane protein                                         |
| 2.39675 | 7.15E-12 | -2.40925 | 1.84E-16 | 4.806   | FIG4      | <i>FIG4</i> homolog, SAC1 lipid phosphatase domain containing ( <i>S. cerevisiae</i> ) |
| 2.72271 | 1.67E-11 | -2.05103 | 2.74E-09 | 4.77374 | FKBP1B    | FK506 binding protein 1B, 12.6 kDa                                                     |
| 2.85278 | 1.12E-24 | -1.90495 | 2.28E-11 | 4.75773 | PTPRN2    | protein tyrosine phosphatase, receptor type, N polypeptide 2                           |
| 2.40482 | 2.62E-08 | -2.28991 | 3.39E-11 | 4.69473 | KIAA1279  | <i>KIAA1279 (KIF1-binding protein)</i>                                                 |
| 2.5088  | 3.05E-07 | -2.18237 | 1.27E-09 | 4.69117 | EPHA5     | EPH receptor A5                                                                        |
| 2.94933 | 2.35E-16 | -1.71572 | 9.44E-09 | 4.66505 | FBXO34    | F-box protein 34                                                                       |
| 2.9362  | 8.66E-12 | -1.71891 | 1.44E-07 | 4.65511 | HERC1     | HECT and RLD domain containing E3 ubiquitin protein ligase family member 1             |
| 3.27604 | 7.81E-18 | -1.37666 | 8.90E-06 | 4.6527  | ATP6V0A1  | ATPase, H+ transporting, lysosomal V0 subunit a1                                       |
| 2.37296 | 6.79E-08 | -2.2596  | 1.99E-10 | 4.63256 | MAPK1     | mitogen-activated protein kinase 1                                                     |
| 2.72567 | 0        | -1.88605 | 2.87E-10 | 4.61172 | DLGAP2    | discs, large ( <i>Drosophila</i> ) homolog-associated protein 2                        |
| 2.58637 | 3.70E-14 | -2.02299 | 1.16E-15 | 4.60936 | CISD1     | CDGSH iron sulfur domain 1                                                             |
| 2.20801 | 2.04E-11 | -2.39773 | 3.43E-11 | 4.60574 | SERINC3   | serine incorporator 3                                                                  |



|         |          |          |          |         |          |                                                                                   |
|---------|----------|----------|----------|---------|----------|-----------------------------------------------------------------------------------|
| 2.00009 | 9.57E-15 | -2.56213 | 5.55E-11 | 4.56222 | AP2M1    | adaptor-related protein complex 2, mu 1 subunit                                   |
| 2.50768 | 2.40E-09 | -2.02606 | 7.89E-08 | 4.53374 | DMXL2    | Dmx-like 2                                                                        |
| 2.44852 | 6.83E-15 | -2.0249  | 7.49E-10 | 4.47342 | PGRMC1   | progesterone receptor membrane component 1                                        |
| 2.5435  | 5.39E-17 | -1.89831 | 2.56E-14 | 4.44181 | IDS      | iduronate 2-sulfatase                                                             |
| 2.37597 | 1.26E-13 | -2.0509  | 2.99E-09 | 4.42687 | ATP6V1D  | ATPase, H+ transporting, lysosomal 34kDa, V1 subunit D                            |
| 2.4622  | 4.05E-15 | -1.93761 | 1.40E-06 | 4.39981 | TM2D3    | TM2 domain containing 3                                                           |
| 2.24835 | 3.69E-12 | -2.11609 | 2.42E-14 | 4.36444 | GOT2     | glutamic-oxaloacetic transaminase 2, mitochondrial (aspartate aminotransferase 2) |
| 2.65351 | 4.69E-14 | -1.70547 | 2.65E-14 | 4.35898 | DDX24    | DEAD (Asp-Glu-Ala-Asp) box polypeptide 24                                         |
| 2.56141 | 1.72E-08 | -1.75816 | 6.01E-16 | 4.31957 | FAM49A   | family with sequence similarity 49, member A                                      |
| 1.97392 | 2.54E-06 | -2.3439  | 9.32E-11 | 4.31782 | ATP2A2   | ATPase, Ca++ transporting, cardiac muscle, slow twitch 2                          |
| 2.31326 | 1.89E-12 | -1.99237 | 1.16E-12 | 4.30563 | PPME1    | protein phosphatase methylesterase 1                                              |
| 1.81134 | 3.04E-06 | -2.47869 | 4.12E-15 | 4.29003 | RRAGA    | Ras-related GTP binding A                                                         |
| 2.26972 | 4.06E-21 | -2.01132 | 1.06E-10 | 4.28104 | ATPIF1   | ATPase inhibitory factor 1                                                        |
| 1.95662 | 9.81E-06 | -2.28408 | 2.79E-08 | 4.2407  | ANKMY2   | ankyrin repeat and MYND domain containing 2                                       |
| 1.51064 | 7.86E-06 | -2.7225  | 4.59E-18 | 4.23314 | SARS     | seryl-tRNA synthetase                                                             |
| 2.59055 | 1.00E-11 | -1.64234 | 4.35E-05 | 4.23289 | LANCL1   | LanC lantibiotic synthetase component C-like 1 (bacterial)                        |
| 2.37026 | 2.48E-13 | -1.8603  | 8.62E-11 | 4.23056 | MGST3    | microsomal glutathione S-transferase 3                                            |
| 2.01046 | 3.07E-10 | -2.16675 | 1.30E-08 | 4.17721 | NDUFA8   | NADH dehydrogenase (ubiquinone) 1 alpha subcomplex, 8, 19kDa                      |
| 2.32039 | 1.32E-12 | -1.85253 | 1.40E-09 | 4.17292 | AUH      | AU RNA binding protein/enoyl-CoA hydratase                                        |
| 2.17178 | 6.63E-19 | -1.99969 | 7.51E-11 | 4.17147 | R3HDM1   | R3H domain containing 1                                                           |
| 1.99891 | 5.26E-30 | -2.14352 | 6.87E-14 | 4.14243 | CHP      | calcineurin-like EF hand protein 1                                                |
| 1.94678 | 2.37E-20 | -2.16239 | 3.39E-11 | 4.10917 | ATP6V1C1 | ATPase, H+ transporting, lysosomal 42kDa, V1 subunit C1                           |
| 2.50412 | 4.92E-13 | -1.59157 | 7.27E-09 | 4.09569 | STOML1   | stomatin (EPB72)-like 1                                                           |
| 2.22021 | 3.34E-08 | -1.80698 | 1.56E-17 | 4.02719 | TUBG2    | tubulin, gamma 2                                                                  |
| 2.50834 | 2.33E-14 | -1.51235 | 3.26E-07 | 4.02069 | PRKAR1B  | protein kinase, cAMP-dependent, regulatory, type I, beta                          |
| 2.05954 | 1.96E-10 | -1.9381  | 4.25E-22 | 3.99764 | C14orf2  | chromosome 14 open reading frame 2                                                |
| 1.8637  | 1.68E-07 | -2.1296  | 6.06E-12 | 3.9933  | PEX11B   | peroxisomal biogenesis factor 11 beta                                             |
| 1.87393 | 2.96E-12 | -2.09782 | 6.95E-12 | 3.97175 | STS      | steroid sulfatase (microsomal), isozyme S                                         |
| 2.2572  | 1.12E-15 | -1.71262 | 6.05E-08 | 3.96982 | ARPC5L   | actin related protein 2/3 complex, subunit 5-like                                 |
| 2.3608  | 7.29E-36 | -1.60822 | 1.84E-11 | 3.96902 | SYT5     | synaptotagmin V                                                                   |
| 1.81686 | 4.63E-08 | -2.13809 | 2.36E-13 | 3.95495 | NDUFV1   | NADH dehydrogenase (ubiquinone) flavoprotein 1, 51kDa                             |
| 2.19475 | 7.96E-12 | -1.74289 | 4.32E-11 | 3.93764 | SLC25A14 | solute carrier family 25 (mitochondrial carrier, brain), member 14                |
| 1.84692 | 8.33E-14 | -2.08499 | 1.11E-10 | 3.93191 | ACTR10   | actin-related protein 10 homolog ( <i>S. cerevisiae</i> )                         |
| 2.10551 | 7.42E-14 | -1.81318 | 9.70E-18 | 3.91869 | KCNB2    | potassium voltage-gated channel, Shab-related subfamily, member 2                 |
| 2.0264  | 3.75E-14 | -1.88738 | 1.21E-09 | 3.91378 | LCMT1    | leucine carboxyl methyltransferase 1                                              |

|         |          |          |          |         |                                                                                                               |                                                        |
|---------|----------|----------|----------|---------|---------------------------------------------------------------------------------------------------------------|--------------------------------------------------------|
| 1.92876 | 1.43E-23 | -1.96901 | 5.66E-11 | 3.89777 | TPM3                                                                                                          | tropomyosin 3                                          |
| 2.13207 | 3.98E-11 | -1.74687 | 1.27E-16 | 3.87894 | ADAM23                                                                                                        | ADAM metallopeptidase domain 23                        |
| 2.36226 | 2.73E-31 | -1.45684 | 1.46E-07 | 3.8191  | DTNB                                                                                                          | dystrobrevin, beta                                     |
| 2.32084 | 1.52E-11 | -1.49225 | 2.22E-09 | 3.81309 | RBM9 (now RE RNA binding protein, fox-1 homolog (C. elegans) 2 / (Previous name: RNA binding motif protein 9) |                                                        |
| 2.12735 | 4.53E-10 | -1.67807 | 8.59E-09 | 3.80542 | PIN1                                                                                                          | peptidylprolyl cis/trans isomerase, NIMA-interacting 1 |
| 1.90303 | 1.26E-08 | -1.88079 | 2.09E-08 | 3.78382 | REEP5                                                                                                         | receptor accessory protein 5                           |
| 2.17498 | 1.25E-12 | -1.51105 | 6.99E-09 | 3.68603 | PITPNB                                                                                                        | phosphatidylinositol transfer protein, beta            |
| 1.84473 | 1.26E-09 | -1.8039  | 1.62E-07 | 3.64863 | ARL8B                                                                                                         | ADP-ribosylation factor-like 8B                        |
| 1.51257 | 2.92E-07 | -2.1149  | 1.68E-12 | 3.62747 | VPS35                                                                                                         | vacuolar protein sorting 35 homolog (S. cerevisiae)    |
| 1.88876 | 3.09E-09 | -1.6864  | 1.00E-13 | 3.57516 | KATNB1                                                                                                        | katanin p80 (WD repeat containing) subunit B 1         |
| 1.50024 | 9.11E-11 | -1.95141 | 1.87E-06 | 3.45165 | LMTK2                                                                                                         | lemur tyrosine kinase 2                                |
| 1.87163 | 1.06E-07 | -1.46592 | 5.39E-07 | 3.33755 | SLC41A3                                                                                                       | solute carrier family 41, member 3                     |
| 1.35474 | 6.18E-07 | -1.38804 | 5.12E-06 | 2.74278 | ALOX12B                                                                                                       | arachidonate 12-lipoxygenase, 12R type                 |
